# Supplementary material for: Efficient stepwise carrier concentration optimization in Ge(1+x)−ySbyTe
Source: Royal Society of Chemistry journal article supplement (doi:10.1039/d4tc03291h), 2024-01-01
Supplement: d4tc03291h1.pdf [file d4tc03291h1.pdf]

## Supplementary Information

### Efficient stepwise carrier concentration optimization in $\text{Ge}_{(1+x)-y}\text{Sb}_y\text{Te}$

Wan-Yu Lyu,<sup>a</sup> Wei-Di Liu,<sup>a,\*</sup> Meng Li,<sup>a</sup> Xiao-Lei Shi,<sup>a</sup> Min Hong,<sup>b</sup> Wenyi Chen,<sup>c</sup> Tianyi Cao,<sup>a</sup>  
Boxuan Hu,<sup>a</sup> Yongqi Chen,<sup>a</sup> Kai Guo,<sup>d</sup> Zhi-Gang Chen<sup>a,\*</sup>

<sup>a</sup>School of Chemistry and Physics, ARC Research Hub in Zero-emission Power Generation for Carbon Neutrality, and Centre for Materials Science, Queensland University of Technology, Brisbane, QLD 4000.

<sup>b</sup>Centre for Future Materials, University of Southern Queensland, Springfield, Queensland 4300, Australia.

<sup>c</sup>School of Mechanical and Mining Engineering, The University of Queensland, Brisbane, Queensland 4072, Australia.

<sup>d</sup>School of Physics and Materials Science, Guangzhou University, Guangzhou 510006, China

Email: [zhigang.chen@qut.edu.au](mailto:zhigang.chen@qut.edu.au); [weidi.liu@qut.edu.au](mailto:weidi.liu@qut.edu.au)

## 1. Experimental section

### 1.1 Synthesis

Polycrystalline samples were prepared in the composition of  $\text{Ge}_{(1+x)}\text{Sb}_y\text{Te}$  ( $x=0, 0.02, 0.04, 0.06, 0.08$ ;  $y=0.04, 0.06, 0.08, 0.12$ ). Precursors, including Ge (99.999%, Sigma-Aldrich, Australia), Te (99.999%, Sigma-Aldrich, Australia), Sb (99.999%, Alfa-Aesar, United States), were weighed following the nominal compositions. The weighted precursors were sealed in quartz ampules and heated in 1223 K for 24 hours followed by water quenching. The obtained samples were further annealed at 873 K for 3 days. The resultant products were further ground into powders and sintered into pellets (SPS, 70 Mpa and 723K) for performance measurement.

### 1.2 Characterization

The crystal structures of as-prepared samples were characterized by X-ray diffraction (XRD, Bruker, United States, Cu  $K_\alpha$  radiation with a wavelength of 1.5418 Å,  $10^\circ \leq 2\theta \leq 80^\circ$ , step with  $0.02^\circ$ ). Field-emission scanning electron microscope (FE-SEM, JSM-7100F, JEOL, Japan) equipped with energy dispersive spectrum (EDS) detector was employed to explore the morphologies and compositions.

### 1.3 Thermoelectrical Property Measurement

$S$  (Seebeck coefficient) and  $\sigma$  (electrical conductivity) of the sintered pellets were simultaneously measured by ZEM-3 (ULVAC Technologies, Inc., Japan).  $\kappa_{\text{total}}$  (total thermal conductivity) is calculated by  $\kappa_{\text{total}}=D \times C_p \times \rho$ , where  $C_p$  is the specific heat estimated from the Dulong-Petit approximation<sup>1</sup>,  $\rho$  is the pellet densities measured by Archimedes method, and  $D$  is the thermal diffusivity coefficient measured by the laser flash diffusivity apparatus (LFA 467, Netzsch, Germany). The Hall coefficient ( $R_H$ ) was measured based on Van der Paw technique<sup>2</sup>. The  $n_p$  (hole concentration) and hole mobility ( $\mu_p$ ) were through the equation  $n_p=1/(eR_H)$  and  $\mu_p=\sigma R_H$ , where  $e$  is the electron charge.

## 2. Thermoelectric properties of $\text{Ge}_{(1+x)}\text{Te}$ .

**Figure S1** displays the thermoelectric properties of  $\text{Ge}_{(1+x)}\text{Te}$  ( $x=0, 0.02, 0.04, 0.06, 0.08$ ). **Figure**

**S1a** shows the electrical conductivity ( $\sigma$ ) of  $\text{Ge}_{(1+x)}\text{Te}$  ( $x=0, 0.02, 0.04, 0.06, 0.08$ ).  $\sigma$  decrease with increased Ge content due to reduced carrier concentration ( $n_p$ ). on the contrary, Seebeck coefficient ( $S$ ) increases with increased Ge content, as shown in **Figure S1b**. In this way, combining these two coupled effect on electrical properties, the power factor ( $S^2\sigma$ ) was displayed in **Figure S1c**. The enlarged  $S^2\sigma$  was obtained with the composition of  $\text{Ge}_{1.04}\text{Te}$ . Total thermal conductivity ( $\kappa_{\text{tot}}$ ) of  $\text{Ge}_{(1+x)}\text{Te}$  ( $x=0, 0.02, 0.04, 0.06, 0.08$ ) are shown in **Figure S1d**. The  $\kappa_{\text{tot}}$  increase with increased Ge content. **Figure S1e** shows the electronic thermal conductivity ( $\kappa_e$ ) of  $\text{Ge}_{(1+x)}\text{Te}$  ( $x=0, 0.02, 0.04, 0.06, 0.08$ ).  $\kappa_e$  is calculated following the Wiedemann–Franz law formula,  $\kappa_e=L\sigma T$ , where  $L$  is the Lorenz number,  $\sigma$  represents the electrical conductivity, and  $T$  is the absolute temperature. The  $L$  is calculated using the following equation proposed by Kim *et al.* based on single parabolic band assumption <sup>3</sup>:

$$L = 1.5 + \exp\frac{-|S|}{116},$$

where  $S$  is the Seebeck coefficient.  $\kappa_e$  decrease with increased Ge content from  $\text{GeTe}$  to  $\text{Ge}_{1.08}\text{Te}$ . The lattice thermal conductivity ( $\kappa_l$ ) is estimated by deducting  $\kappa_e$  from measured  $\kappa_{\text{tot}}$ :  $\kappa_l=\kappa_{\text{tot}}-\kappa_e$ . The results shown in **Figure S1f**.  $\kappa_l$  increases with increased Ge content. This may be due to the increased Ge precipitates in the  $\text{GeTe}$  matrix. The extra-matrix Ge exists as composites, the increased composites content resulting in enlarged  $\kappa_l$ .

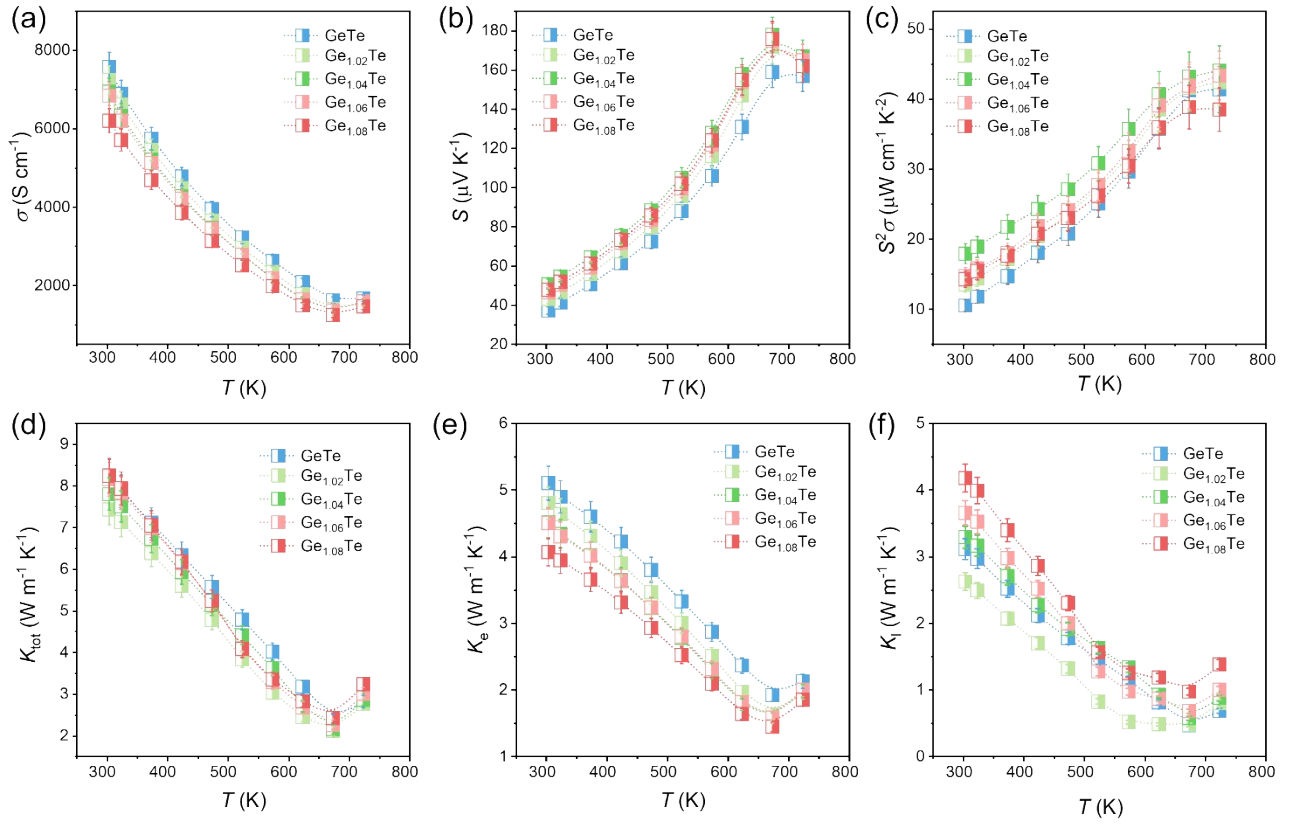

Figure S1. Electrical and thermal properties of  $\text{Ge}_{(1+x)}\text{Te}$  ( $x=0, 0.02, 0.04, 0.06, 0.08$ ). The temperature-dependent (a)  $\sigma$ , (b)  $S$ , (c)  $S^2\sigma$ , (d)  $\kappa_{\text{tot}}$ , (e)  $\kappa_e$ , and (f)  $\kappa_l$ .

**Figure S2** shows the  $zT$  value of  $\text{Ge}_{(1+x)}\text{Te}$  ( $x=0, 0.02, 0.04, 0.06, 0.08$ ). Due to the contribution of both electrical and thermal parts, peak  $zT$  of 1.35 was achieved with  $\text{Ge}_{1.04}\text{Te}$  at 673K.

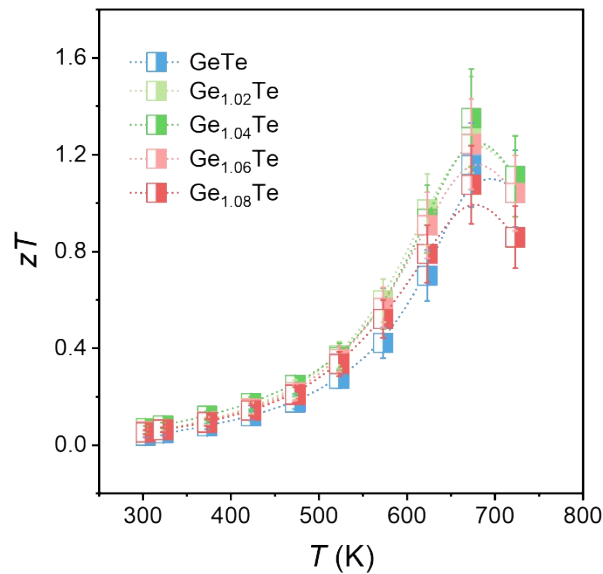

Figure S2.  $zT$  value of  $\text{Ge}_{(1+x)}\text{Te}$  ( $x=0, 0.02, 0.04, 0.06, 0.08$ ).

Figure S3 displays the enlarged peak of Ge precipitates of all samples.

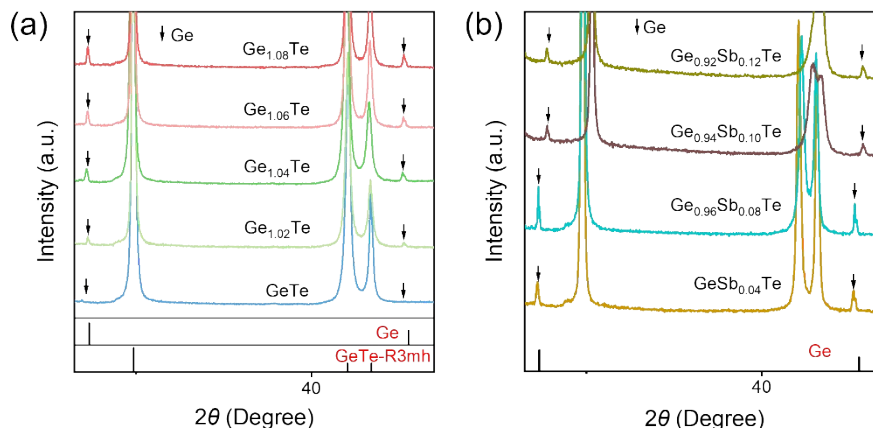

Figure S3. Enlarged peak of Ge precipitates for (a) Ge<sub>(1+x)</sub>Te ( $x=0, 0.02, 0.04, 0.06, 0.08$ ), and (b) Ge<sub>1.04-y</sub>Sb<sub>y</sub>Te ( $y=0.04, 0.08, 0.10, 0.12$ ).

Figure S4 shows the comparison of  $zT$  values with other Sb single doped GeTe. The  $zT$  value of Ge<sub>1.96</sub>Sb<sub>0.08</sub>Te is comparable to the literatures.

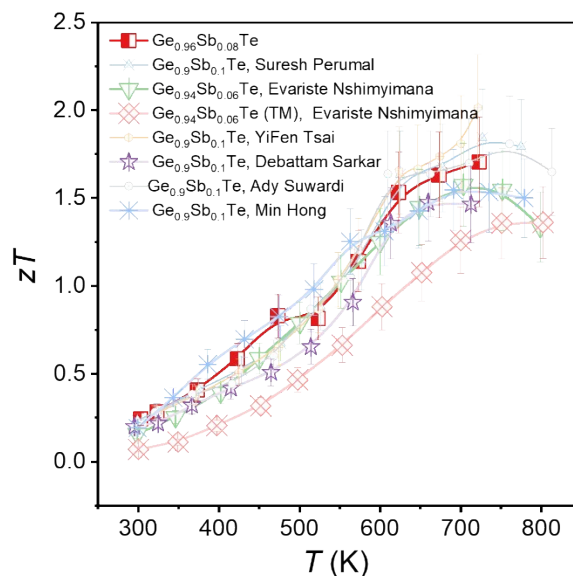

Figure S4. Comparison of  $zT$  values with other Sb single doped GeTe.

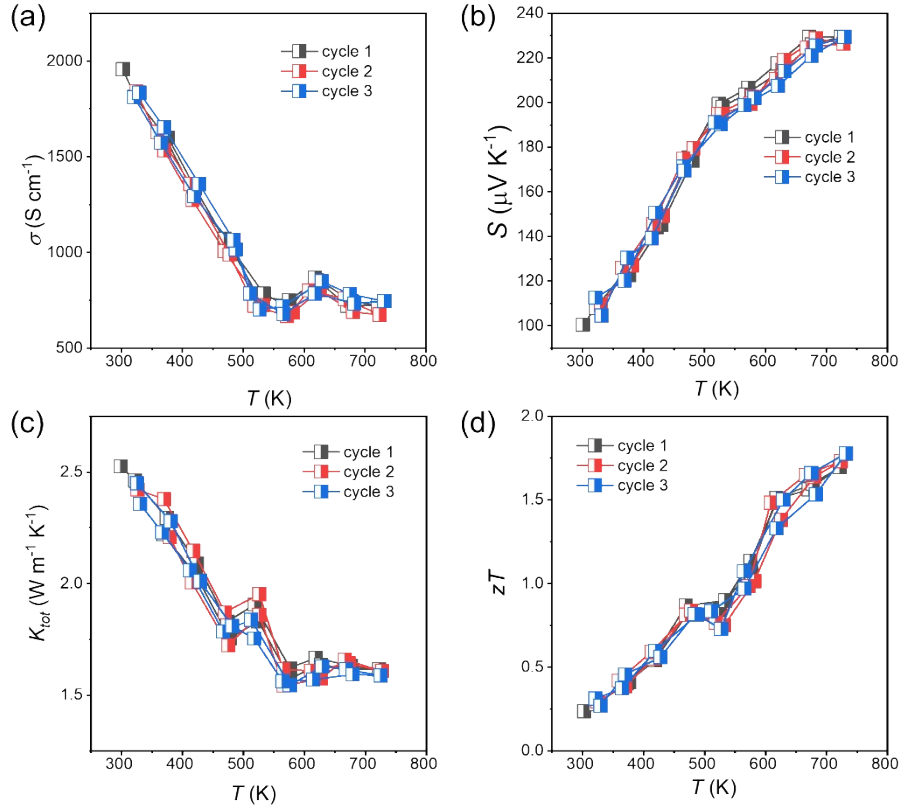

Figure S5. 3 Cycling test of thermoelectric properties for  $\text{Ge}_{0.96}\text{Sb}_{0.08}\text{Te}$ .

### 3. Electrical transport properties

The determination of effective mass  $m^*$  in this work is based on the single parabolic band (SPB) approximation with the acoustic phonon scattering<sup>4,5</sup>.

$$m^* = \frac{h^2}{2k_B T} \left[ \frac{n}{4\pi F_{1/2}(\eta)} \right]^{2/3} \quad (1)$$

$$S = \pm \frac{k_B}{e} \left( \frac{2F_1(\eta)}{F_0(\eta)} - \eta \right) \quad (2)$$

$$F_n(\eta) = \int_0^\infty \frac{x^n dx}{1 + e^{x-\eta}} \quad (3)$$

$$\eta = \frac{E_f}{k_B T} \quad (4)$$

Where  $k_B$  is the Boltzmann constant,  $e$  the electron charge,  $h$  the Planck constant,  $E_f$  is the Fermi

energy,  $\eta$  is the reduced Fermi energy,  $F_n(\eta)$  is the n-th order Fermi integral. Based on the measured room temperature Seebeck coefficient ( $S$ ) and carrier concentration ( $n$ ),  $m^*$  can then be determined from equation (1-4).”

Table S1. The carrier concentration ( $n_p$ ), carrier mobility ( $\mu_p$ ), and mass density of all samples.

| Composition                              | $n_p$ ( $10^{20} \text{ cm}^{-3}$ ) | $\mu_p$ ( $\text{cm}^2 \text{ V}^{-1} \text{ s}^{-1}$ ) | $\rho$ ( $\text{g cm}^{-3}$ ) |
|------------------------------------------|-------------------------------------|---------------------------------------------------------|-------------------------------|
| GeTe                                     | 8.23                                | 57.44                                                   | 5.9352                        |
| Ge <sub>1.02</sub> Te                    | 7.52                                | 60.15                                                   | 5.8968                        |
| Ge <sub>1.04</sub> Te                    | 6.83                                | 63.48                                                   | 5.946                         |
| Ge <sub>1.06</sub> Te                    | 4.53                                | 94.35                                                   | 5.8645                        |
| Ge <sub>1.08</sub> Te                    | 3.84                                | 100.87                                                  | 5.8974                        |
| GeSb <sub>0.04</sub> Te                  | 3.22                                | 52.52                                                   | 5.8245                        |
| Ge <sub>0.96</sub> Sb <sub>0.08</sub> Te | 2.78                                | 44.32                                                   | 5.9838                        |
| Ge <sub>0.94</sub> Sb <sub>0.10</sub> Te | 2.36                                | 20.96                                                   | 5.8744                        |
| Ge <sub>0.92</sub> Sb <sub>0.12</sub> Te | 1.83                                | 10.54                                                   | 5.8326                        |

#### 4. Thermal transport properties

Element substitution can cause lattice fluctuation and led to a disorder of the crystal matrix, which can be expressed by the Callaway <sup>6</sup> and Klmen <sup>7</sup> model, which has been used by many thermoelectric systems <sup>8-10</sup>. The lattice distribution can be evaluated by  $\kappa_l/\kappa_{l0}$ , which  $\kappa_{l0}$  represents the lattice thermal conductivity of pristine GeTe,  $\kappa_l$  is measured lattice thermal conductivity of Ge<sub>(1+x)</sub>Sb<sub>y</sub>Te.

$$\frac{\kappa_l}{\kappa_{l0}} = \frac{\tan^{-1}(u)}{u} \quad (5)$$

$$u^2 = \frac{\pi^2 \theta_D \Omega}{h v_s^2} \kappa_{l0} \Gamma_{tot} \quad (6)$$

where  $u$ ,  $\Omega$ ,  $v_s$ ,  $\theta_D$ , and  $\Gamma_{tot}$  are the disorder scaling parameter, the average volume per atom, the sound

velocity, the Debye temperature, and the experimental disorder scattering parameter, respectively.

$\Gamma_{tot}$  can be derived from measured  $\kappa_l$ .

## Reference

1. J. Li, X. Y. Zhang, S. Q. Lin, Z. W. Chen and Y. Z. Pei, *Chemistry of Materials*, 2017, **29**, 605-611.
2. K. A. Borup, E. S. Toberer, L. D. Zoltan, G. Nakatsukasa, M. Errico, J.-P. Fleurial, B. B. Iversen and G. J. Snyder, *Rev. Sci. Instrum.*, 2012, **83**.
3. H.-S. Kim, Z. M. Gibbs, Y. Tang, H. Wang and G. J. Snyder, *APL Materials*, 2015, **3**.
4. H. J. Goldsmid, *Introduction to Thermoelectricity*, Springer Series in Materials Science, 2016.
5. J. Zhu, X. Zhang, M. Guo, J. Li, J. Hu, S. Cai, W. Cai, Y. Zhang and J. Sui, *npj Computational Materials*, 2021, **7**.
6. J. Callaway and H. C. von Baeyer, *Phys. Rev.*, 1960, **120**, 1149-1154.
7. P. G. Klemens, *Phys. Rev.*, 1960, **119**, 507-509.
8. J. Yang, G. P. Meisner and L. Chen, *Appl. Phys. Lett.*, 2004, **85**, 1140-1142.
9. H. Wang, A. D. LaLonde, Y. Pei and G. J. Snyder, *Adv. Funct. Mater.*, 2013, **23**, 1586-1596.
10. Z. Zheng, X. L. Su, R. G. Deng, C. Stoumpos, H. Y. Xie, W. Liu, Y. G. Yan, S. Q. Hao, C. Uher, C. Wolverton, M. G. Kanatzidis and X. F. Tang, *J. Am. Chem. Soc.*, 2018, **140**, 2673-2686.
